# Supplementary material for: Intrinsic disorder within AKAP79 fine-tunes anchored phosphatase activity toward substrates and drug sensitivity
Source: eLife journal article supplement (doi:10.7554/elife.30872), 2017-09-29
Supplement: supp [file elife-30872-supp-v1.zip]

Archive with 10 entries (10 files):
- elife_poa_e30872_Figure_7_video_4.mov
- elife_poa_e30872_Supplementary_File_1.xlsx
- elife_poa_e30872_Figure_6_figure_supplement_1.tif
- elife_poa_e30872_Figure_7_video_3.mov
- elife_poa_e30872_Transparent_Reporting_File.pdf
- elife_poa_e30872_Figure_7_figure_supplement_1.tif
- elife_poa_e30872_Figure_7_video_1.mov
- elife_poa_e30872_Figure_7_video_2.mov
- elife_poa_e30872_Figure_7_video_5.mov
- elife_poa_e30872_Figure_4_video_1.mov
