# Supplementary material for: Intrinsic disorder within AKAP79 fine-tunes anchored phosphatase activity toward substrates and drug sensitivity
Source: eLife journal article supplement (doi:10.7554/elife.30872), 2017-09-29
Supplement: supp [file elife-30872-supp-v1.zip › elife_poa_e30872_Supplementary_File_1.xlsx]

## Sheet: ActiveState(+Calcium)
MS2_Scan_Number	MS2_Query_Mass	MS2_Precursor_Mass	MS2_PPM_Error	MS2_Peptide1_Mass	MS2_Peptide2_Mass	MS3_Peptide1_ID	MS3_Peptide2_ID	MS3_Peptide1_ProphetExpectScore	MS3_Peptide2_ProphetExpectScore	MS3_Peptide1_PlainSequence	MS3_Peptide2_PlainSequence	MS3_Scan_Peptide1	MS3_Scan_Peptide2	MS3_Protein1_ID	MS3_Protein2_ID	Peptide1_LinkedLys_Position	Peptide2_LinkedLys_Position
7221	3693.88	3693.88	0.001	1412.68	1529.8	AIDPK[325.13]LSTTDR	VVK[325.13]AVPFPPSHR	0.0044	0.0006	AIDPKLSTTDR	VVKAVPFPPSHR	7224	7225	CnA_(human)	CnA_(human)	10	19
13361	5554.8	5555.8	0.008	2253.03	2550.36	YENGKYDIK[325.13]DVGVDNAGAK	YNGK[325.13]LIAYPIAVEALSLIYNK	1.31e-05	1.16e-05	YENGKYDIKDVGVDNAGAK	YNGKLIAYPIAVEALSLIYNK	13364	13363	Fusion_of_MBP-linker-AKAP79_10xHis)_(human)	Fusion_of_MBP-linker-AKAP79_10xHis)_(human)	205	128
6289	3676.79	3676.79	0.013	1139.53	1785.85	AHLMK[325.13]EGR	LTAK[325.13]EVFDNDGKPR	3.42e-06	2.37e-05	AHLMKEGR	LTAKEVFDNDGKPR	6290	6293	CnA_(human)	CnA_(human)	52	32
3951	3435.73	3435.73	0.032	1153.52	1530.8	AHLM[147.04]K[325.13]EGR	VVK[325.13]AVPFPPSHR	0.0005	0.0008	AHLMKEGR	VVKAVPFPPSHR	3952	3953	CnA_(human)	CnA_(human)	52	19
13668	6680.49	6680.49	0.035	4356.19	1572.9	IITEGASILRQEK[325.13]NLLDIDAPVTVC[160.03]GDIHGQFFDLMK	ILYPK[325.13]TLFLLR	0.0015	0.0155	IITEGASILRQEKNLLDIDAPVTVCGDIHGQFFDLMK	ILYPKTLFLLR	13672	13671	CnA_(human)	CnA_(human)	76	142
12400	6807.3	6807.3	0.038	3802.86	2253.04	FGGYAQSGLLAEITPDK[325.13]AFQDKLYPFTWDAVR	YENGK[325.13]YDIKDVGVDNAGAK	0.0021	6.82e-05	FGGYAQSGLLAEITPDKAFQDKLYPFTWDAVR	YENGKYDIKDVGVDNAGAK	12402	12403	Fusion_of_MBP-linker-AKAP79_10xHis)_(human)	Fusion_of_MBP-linker-AKAP79_10xHis)_(human)	109	201
4761	3302.61	3302.61	0.041	1137.53	1413.68	AHLMK[325.13]EGR	AIDPK[325.13]LSTTDR	6.97e-05	1.26e-06	AHLMKEGR	AIDPKLSTTDR	4764	4763	CnA_(human)	CnA_(human)	52	10
14782	5853.89	5853.89	0.044	3333.62	1768.86	GK[325.13]SALMFNLQEPYFTWPLIAADGGYAFK	TWEEIPALDK[325.13]ELK	0.0005	0.0219	GKSALMFNLQEPYFTWPLIAADGGYAFK	TWEEIPALDKELK	14784	14783	Fusion_of_MBP-linker-AKAP79_10xHis)_(human)	Fusion_of_MBP-linker-AKAP79_10xHis)_(human)	170	163
6809	3669.71	3669.71	0.047	1926.85	991.461	HLTEYFTFK[325.13]QEC[160.03]K	IK[325.13]YSER	8.66e-08	0.0175	HLTEYFTFKQECK	IKYSER	6813	6810	CnA_(human)	CnA_(human)	163	169
8021	3528.81	3528.81	0.073	1413.68	1363.72	AIDPK[325.13]LSTTDR	VDILK[325.13]AHLMK	0.0126	1.4e-05	AIDPKLSTTDR	VDILKAHLMK	8025	8024	CnA_(human)	CnA_(human)	10	47
5741	3660.92	3661.92	0.078	1379.71	1529.8	VDILK[325.13]AHLM[147.04]K	VVK[325.13]AVPFPPSHR	9.58e-05	0.0015	VDILKAHLMK	VVKAVPFPPSHR	5744	5745	CnA_(human)	CnA_(human)	47	19
8080	3906.86	3906.86	0.091	1226.61	1928.84	IPC[160.03]IK[325.13]FPR	SNHSK[325.13]IIEDSDC[160.03]SIK	0.0004	6.98e-08	IPCIKFPR	SNHSKIIEDSDCSIK	8081	8082	Fusion_of_MBP-linker-AKAP79_10xHis)_(human)	Fusion_of_MBP-linker-AKAP79_10xHis)_(human)	554	566
2743	2147.12	2148.12	0.111	669.345	726.366	LGK[325.13]R	NK[325.13]IR	0.0149	0.0329	LGKR	NKIR	2746	2747	CnB_(human)	CnA_(human)	25	399
10810	5273.45	5273.45	0.114	2571.15	1950.9	HVM[147.04]TNLGEK[325.13]LTDEEVDEMIR	VFDK[325.13]DGNGYISAAELR	5.95e-06	9.73e-05	HVMTNLGEKLTDEEVDEMIR	VFDKDGNGYISAAELR	10812	10811	CaM_(mouse)	CaM_(mouse)	116	95
2625	2039.05	2039.05	0.121	618.301	669.345	FK[325.13]K	LGK[325.13]R	0.0371	0.0148	FKK	LGKR	2628	2629	CnB_(human)	CnB_(human)	28	25
13472	5626.86	5626.86	0.15	1573.9	3301.56	ILYPK[325.13]TLFLLR	QEK[325.13]NLLDIDAPVTVC[160.03]GDIHGQFFDLMK	0.0003	0.07	ILYPKTLFLLR	QEKNLLDIDAPVTVCGDIHGQFFDLMK	13475	13474	CnA_(human)	CnA_(human)	142	76
8625	3902.99	3902.99	0.153	1787.87	1363.72	LTAK[325.13]EVFDNDGKPR	VDILK[325.13]AHLMK	0.0002	4.46e-06	LTAKEVFDNDGKPR	VDILKAHLMK	8629	8628	CnA_(human)	CnA_(human)	32	47
2656	2148.1	2148.1	0.171	727.35	669.345	K[325.13]LDR	LGK[325.13]R	0.0249	0.0738	KLDR	LGKR	2660	2659	CnA_(human)	CnB_(human)	214	25
10977	4111.16	4111.16	0.175	1573.9	1785.86	ILYPK[325.13]TLFLLR	LTAK[325.13]EVFDNDGKPR	7.66e-06	3.42e-05	ILYPKTLFLLR	LTAKEVFDNDGKPR	10980	10979	CnA_(human)	CnA_(human)	142	32
7077	3950.94	3950.94	0.188	1412.68	1786.86	AIDPK[325.13]LSTTDR	LTAK[325.13]EVFDNDGKPR	0.0002	5.67e-05	AIDPKLSTTDR	LTAKEVFDNDGKPR	7080	7079	CnA_(human)	CnA_(human)	10	32
3549	2550.29	2550.29	0.191	958.454	840.434	AIGK[325.13]M[147.04]AR	K[325.13]EVIR	0.0015	0.0004	AIGKMAR	KEVIR	3553	3552	CnA_(human)	CnA_(human)	405	393
7263	2631.33	2631.33	0.204	653.313	1226.61	GPK[325.13]R	IPC[160.03]IK[325.13]FPR	0.0339	2.84e-05	GPKR	IPCIKFPR	7266	7267	Fusion_of_MBP-linker-AKAP79_10xHis)_(human)	Fusion_of_MBP-linker-AKAP79_10xHis)_(human)	560	554
5675	4743.41	4743.41	0.221	2205.15	1786.86	LSTTDRVVK[325.13]AVPFPPSHR	LTAK[325.13]EVFDNDGKPR	0.0724	0.0005	LSTTDRVVKAVPFPPSHR	LTAKEVFDNDGKPR	5679	5676	CnA_(human)	CnA_(human)	19	32
13797	4629.35	4629.35	0.293	1325.58	2552.36	YENGK[325.13]YDIK	YNGK[325.13]LIAYPIAVEALSLIYNK	0.0004	2.58e-06	YENGKYDIK	YNGKLIAYPIAVEALSLIYNK	13800	13801	Fusion_of_MBP-linker-AKAP79_10xHis)_(human)	Fusion_of_MBP-linker-AKAP79_10xHis)_(human)	201	128
8802	2878.51	2878.51	0.317	657.308	1469.8	AK[325.13]SR	LK[325.13]IPC[160.03]IKFPR	0.034	0.0007	AKSR	LKIPCIKFPR	8805	8806	Fusion_of_MBP-linker-AKAP79_10xHis)_(human)	Fusion_of_MBP-linker-AKAP79_10xHis)_(human)	545	549
12658	3696.89	3696.89	0.333	1372.59	1572.89	EVFDNDGK[325.13]PR	ILYPK[325.13]TLFLLR	0.0021	1.3e-05	EVFDNDGKPR	ILYPKTLFLLR	12661	12660	CnA_(human)	CnA_(human)	40	142
7602	4067.06	4067.06	0.451	1785.85	1529.8	LTAK[325.13]EVFDNDGKPR	VVK[325.13]AVPFPPSHR	0.0212	0.0002	LTAKEVFDNDGKPR	VVKAVPFPPSHR	7604	7605	CnA_(human)	CnA_(human)	32	19
12316	7854.94	7854.94	0.462	3287.69	3815.84	EFLENYLLTDEGLEAVNK[325.13]DKPLGAVALK	VTVEHPDK[325.13]LEEKFPQVAATGDGPDIIFWAHDR	0.067	0.0002	EFLENYLLTDEGLEAVNKDKPLGAVALK	VTVEHPDKLEEKFPQVAATGDGPDIIFWAHDR	12317	12320	Fusion_of_MBP-linker-AKAP79_10xHis)_(human)	Fusion_of_MBP-linker-AKAP79_10xHis)_(human)	321	68
5975	3721.78	3721.78	0.482	1018.48	1951.9	K[325.13]RSESSK	VFDK[325.13]DGNGYISAAELR	0.0206	0.0001	KRSESSK	VFDKDGNGYISAAELR	5976	5979	Fusion_of_MBP-linker-AKAP79_10xHis)_(human)	CaM_(mouse)	513	95
10841	3051.65	3051.65	0.496	1572.89	727.352	ILYPK[325.13]TLFLLR	K[325.13]LDR	2.05e-07	0.0033	ILYPKTLFLLR	KLDR	10843	10844	CnA_(human)	CnA_(human)	142	214
8954	3962.01	3962.01	0.502	1846.89	1363.72	AAVLK[325.13]YENNVM[147.04]NIR	VDILK[325.13]AHLMK	0.0015	0.002	AAVLKYENNVMNIR	VDILKAHLMK	8958	8957	CnA_(human)	CnA_(human)	323	47
13782	4147.16	4147.16	0.621	1627.89	1767.86	AGLTFLVDLIK[325.13]NK	TWEEIPALDK[325.13]ELK	2.85e-05	0.0003	AGLTFLVDLIKNK	TWEEIPALDKELK	13785	13786	Fusion_of_MBP-linker-AKAP79_10xHis)_(human)	Fusion_of_MBP-linker-AKAP79_10xHis)_(human)	226	163
3635	2420.23	2420.23	0.63	942.459	726.366	AIGK[325.13]MAR	NK[325.13]IR	0.0079	0.0632	AIGKMAR	NKIR	3639	3638	CnA_(human)	CnA_(human)	405	399
2735	2204.14	2204.14	0.636	726.366	726.366	NK[325.13]IR	NK[325.13]IR	0.0189	0.0116	NKIR	NKIR	2739	2738	CnA_(human)	CnA_(human)	399	399
10722	5291.67	5291.67	0.69	1901.88	2638.38	GFSPQHK[325.13]ITSFEEAK	GLTPTGMLPSGVLSGGK[325.13]QTLQSAIK	2.55e-06	0.0001	GFSPQHKITSFEEAK	GLTPTGMLPSGVLSGGKQTLQSAIK	10723	10726	CnA_(human)	CnA_(human)	456	441
9340	3304.73	3304.73	0.809	1084.53	1468.8	GAWASLK[325.13]R	LKIPC[160.03]IK[325.13]FPR	0.0028	3.23e-06	GAWASLKR	LKIPCIKFPR	9343	9342	Fusion_of_MBP-linker-AKAP79_10xHis)_(human)	Fusion_of_MBP-linker-AKAP79_10xHis)_(human)	506	554
12266	4158.2	4158.2	0.819	1830.9	1575.9	AAVLK[325.13]YENNVMNIR	ILYPK[325.13]TLFLLR	4.31e-06	0.0049	AAVLKYENNVMNIR	ILYPKTLFLLR	12268	12267	CnA_(human)	CnA_(human)	323	142
8751	2872.51	2873.51	0.848	653.314	1467.79	GPK[325.13]R	LK[325.13]IPC[160.03]IKFPR	0.0889	0.0001	GPKR	LKIPCIKFPR	8754	8753	Fusion_of_MBP-linker-AKAP79_10xHis)_(human)	Fusion_of_MBP-linker-AKAP79_10xHis)_(human)	560	549
11437	6615.46	6615.45	0.865	1767.87	4096.19	TWEEIPALDK[325.13]ELK	VNYGVTVLPTFK[325.13]GQPSKPFVGVLSAGINAASPNKELAK	0.0169	0.0909	TWEEIPALDKELK	VNYGVTVLPTFKGQPSKPFVGVLSAGINAASPNKELAK	11438	11439	Fusion_of_MBP-linker-AKAP79_10xHis)_(human)	Fusion_of_MBP-linker-AKAP79_10xHis)_(human)	163	277
3373	2318.21	2318.21	0.868	840.434	726.366	K[325.13]EVIR	NK[325.13]IR	0.0003	0.0012	KEVIR	NKIR	3377	3376	CnA_(human)	CnA_(human)	393	399
14981	7001.73	7002.73	0.878	3288.69	2961.63	EFLENYLLTDEGLEAVNK[325.13]DKPLGAVALK	LIAYPIAVEALSLIYNK[325.13]DLLPNPPK	0.0157	0.0002	EFLENYLLTDEGLEAVNKDKPLGAVALK	LIAYPIAVEALSLIYNKDLLPNPPK	14985	14984	Fusion_of_MBP-linker-AKAP79_10xHis)_(human)	Fusion_of_MBP-linker-AKAP79_10xHis)_(human)	321	145
11803	6808.3	6808.3	0.909	3803.86	2253.03	FGGYAQSGLLAEITPDKAFQDK[325.13]LYPFTWDAVR	YENGK[325.13]YDIKDVGVDNAGAK	0.0429	1.4e-06	FGGYAQSGLLAEITPDKAFQDKLYPFTWDAVR	YENGKYDIKDVGVDNAGAK	11805	11806	Fusion_of_MBP-linker-AKAP79_10xHis)_(human)	Fusion_of_MBP-linker-AKAP79_10xHis)_(human)	114	201
10811	5172.62	5172.61	0.918	3287.69	1133.53	EFLENYLLTDEGLEAVNK[325.13]DKPLGAVALK	FEK[325.13]DTGIK	0.0001	0.0074	EFLENYLLTDEGLEAVNKDKPLGAVALK	FEKDTGIK	10813	10812	Fusion_of_MBP-linker-AKAP79_10xHis)_(human)	Fusion_of_MBP-linker-AKAP79_10xHis)_(human)	321	55
5109	3802.77	3802.77	0.928	1084.53	1966.83	GAWASLK[325.13]R	K[325.13]C[160.03]PQEAGASDQPEPTR	0.0355	5.65e-06	GAWASLKR	KCPQEAGASDQPEPTR	5112	5111	Fusion_of_MBP-linker-AKAP79_10xHis)_(human)	Fusion_of_MBP-linker-AKAP79_10xHis)_(human)	506	484
10770	4857.27	4857.27	0.945	2336	1769.86	NK[325.13]HMNADTDYSIAEAAFNK	TWEEIPALDK[325.13]ELK	7.69e-06	0.0007	NKHMNADTDYSIAEAAFNK	TWEEIPALDKELK	10774	10773	Fusion_of_MBP-linker-AKAP79_10xHis)_(human)	Fusion_of_MBP-linker-AKAP79_10xHis)_(human)	228	163
10799	6938.48	6938.49	0.969	2371.23	3815.85	LVIWINGDK[325.13]GYNGLAEVGKK	VTVEHPDK[325.13]LEEKFPQVAATGDGPDIIFWAHDR	2.67e-06	6.02e-05	LVIWINGDKGYNGLAEVGKK	VTVEHPDKLEEKFPQVAATGDGPDIIFWAHDR	10802	10803	Fusion_of_MBP-linker-AKAP79_10xHis)_(human)	Fusion_of_MBP-linker-AKAP79_10xHis)_(human)	41	68
15842	7002.74	7002.73	0.974	3287.69	2963.65	EFLENYLLTDEGLEAVNKDK[325.13]PLGAVALK	LIAYPIAVEALSLIYNK[325.13]DLLPNPPK	0.0361	0.0003	EFLENYLLTDEGLEAVNKDKPLGAVALK	LIAYPIAVEALSLIYNKDLLPNPPK	15846	15843	Fusion_of_MBP-linker-AKAP79_10xHis)_(human)	Fusion_of_MBP-linker-AKAP79_10xHis)_(human)	323	145
1824	2469.17	2469.17	1.013	727.35	990.413	K[325.13]LDR	SK[325.13]SEESK	0.0072	0.0971	KLDR	SKSEESK	1827	1828	CnA_(human)	Fusion_of_MBP-linker-AKAP79_10xHis)_(human)	214	751
7972	4100.99	4100.99	1.024	1562.73	1786.86	ITSFEEAK[325.13]GLDR	LTAK[325.13]EVFDNDGKPR	0.0378	0.0001	ITSFEEAKGLDR	LTAKEVFDNDGKPR	7973	7976	CnA_(human)	CnA_(human)	464	32
12636	4734.38	4734.37	1.042	3114.54	868.433	K[325.13]SQTTGFPSLITIFSAPNYLDVYNNK	SK[325.13]NVPK	0.0039	0.0601	KSQTTGFPSLITIFSAPNYLDVYNNK	SKNVPK	12640	12637	CnA_(human)	Fusion_of_MBP-linker-AKAP79_10xHis)_(human)	293	779
3409	2261.18	2261.19	1.052	840.434	669.344	K[325.13]EVIR	LGK[325.13]R	0.0007	0.0845	KEVIR	LGKR	3411	3412	CnA_(human)	CnB_(human)	393	25
10436	5530.64	5531.64	1.067	2828.34	1950.9	EAFSLFDKDGDGTITTK[325.13]ELGTVMR	VFDK[325.13]DGNGYISAAELR	9.48e-07	0.007	EAFSLFDKDGDGTITTKELGTVMR	VFDKDGNGYISAAELR	10440	10439	CaM_(mouse)	CaM_(mouse)	31	95
2581	2206.1	2206.1	1.08	727.35	727.35	K[325.13]LDR	K[325.13]LDR	0.0977	0.0095	KLDR	KLDR	2585	2584	CnA_(human)	CnA_(human)	214	214
5245	4261.14	4261.14	1.095	1786.85	1722.88	LTAK[325.13]EVFDNDGKPR	VDILKAHLM[147.04]K[325.13]EGR	0.0648	0.0328	LTAKEVFDNDGKPR	VDILKAHLMKEGR	5247	5246	CnA_(human)	CnA_(human)	32	52
13686	8471.05	8471.03	1.209	4604.09	3115.55	FKEPPAYGPMC[160.03]DILWSDPLEDFGNEK[325.13]TQEHFTHNTVR	K[325.13]SQTTGFPSLITIFSAPNYLDVYNNK	0.0938	0.0009	FKEPPAYGPMCDILWSDPLEDFGNEKTQEHFTHNTVR	KSQTTGFPSLITIFSAPNYLDVYNNK	13690	13689	CnA_(human)	CnA_(human)	243	293
5699	3529.72	3529.72	1.224	991.462	1786.86	IK[325.13]YSER	LTAK[325.13]EVFDNDGKPR	0.0187	0.0033	IKYSER	LTAKEVFDNDGKPR	5700	5701	CnA_(human)	CnA_(human)	169	32
12322	7854.94	7855.94	1.295	3287.68	3815.85	EFLENYLLTDEGLEAVNKDK[325.13]PLGAVALK	VTVEHPDK[325.13]LEEKFPQVAATGDGPDIIFWAHDR	0.0002	1.28e-05	EFLENYLLTDEGLEAVNKDKPLGAVALK	VTVEHPDKLEEKFPQVAATGDGPDIIFWAHDR	12325	12326	Fusion_of_MBP-linker-AKAP79_10xHis)_(human)	Fusion_of_MBP-linker-AKAP79_10xHis)_(human)	323	68
3253	4400.09	4400.1	1.324	1679.85	1968.84	ALKPK[325.13]AGSEAADVAR	K[325.13]C[160.03]PQEAGASDQPEPTR	2.33e-06	0.0002	ALKPKAGSEAADVAR	KCPQEAGASDQPEPTR	3254	3257	Fusion_of_MBP-linker-AKAP79_10xHis)_(human)	Fusion_of_MBP-linker-AKAP79_10xHis)_(human)	473	484
4077	2433.28	2433.28	1.354	841.437	840.434	K[325.13]EVIR	K[325.13]EVIR	0.0007	0.0002	KEVIR	KEVIR	4081	4080	CnA_(human)	CnA_(human)	393	393
8871	4257.16	4257.17	1.379	1133.53	2372.23	FEK[325.13]DTGIK	LVIWINGDKGYNGLAEVGK[325.13]K	0.0185	0.0002	FEKDTGIK	LVIWINGDKGYNGLAEVGKK	8872	8873	Fusion_of_MBP-linker-AKAP79_10xHis)_(human)	Fusion_of_MBP-linker-AKAP79_10xHis)_(human)	55	51
10288	5699.78	5700.78	1.506	1133.53	3814.85	FEK[325.13]DTGIK	VTVEHPDK[325.13]LEEKFPQVAATGDGPDIIFWAHDR	0.0165	0.0019	FEKDTGIK	VTVEHPDKLEEKFPQVAATGDGPDIIFWAHDR	10289	10290	Fusion_of_MBP-linker-AKAP79_10xHis)_(human)	Fusion_of_MBP-linker-AKAP79_10xHis)_(human)	55	68
16558	7080.62	7080.63	1.777	3365.6	2963.61	IAATMENAQK[325.13]GEIMPNIPQMSAFWYAVR	LIAYPIAVEALSLIYNK[325.13]DLLPNPPK	0.0167	0.0097	IAATMENAQKGEIMPNIPQMSAFWYAVR	LIAYPIAVEALSLIYNKDLLPNPPK	16560	16559	Fusion_of_MBP-linker-AKAP79_10xHis)_(human)	Fusion_of_MBP-linker-AKAP79_10xHis)_(human)	352	145
2327	2773.35	2773.35	1.866	1153.52	868.43	AHLM[147.04]K[325.13]EGR	SK[325.13]NVPK	0.0365	0.0047	AHLMKEGR	SKNVPK	2329	2330	CnA_(human)	Fusion_of_MBP-linker-AKAP79_10xHis)_(human)	52	779
10491	5301.71	5301.72	1.89	3287.68	1262.62	EFLENYLLTDEGLEAVNKDK[325.13]PLGAVALK	KFEK[325.13]DTGIK	0.0073	0.0001	EFLENYLLTDEGLEAVNKDKPLGAVALK	KFEKDTGIK	10493	10492	Fusion_of_MBP-linker-AKAP79_10xHis)_(human)	Fusion_of_MBP-linker-AKAP79_10xHis)_(human)	323	55
6085	3377.69	3377.7	1.919	840.435	1785.85	K[325.13]EVIR	LTAK[325.13]EVFDNDGKPR	0.0014	0.0004	KEVIR	LTAKEVFDNDGKPR	6088	6087	CnA_(human)	CnA_(human)	393	32
8618	5560.66	5561.65	1.961	1928.85	2880.41	SNHSK[325.13]IIEDSDC[160.03]SIK	VQEEAEILDIQTQTPLNDQATK[325.13]AK	0.0002	0.0019	SNHSKIIEDSDCSIK	VQEEAEILDIQTQTPLNDQATKAK	8619	8620	Fusion_of_MBP-linker-AKAP79_10xHis)_(human)	Fusion_of_MBP-linker-AKAP79_10xHis)_(human)	566	598
2022	3736.73	3738.73	2.083	1967.85	1017.48	K[325.13]C[160.03]PQEAGASDQPEPTR	K[325.13]RSESSK	0.0003	0.0018	KCPQEAGASDQPEPTR	KRSESSK	2024	2025	Fusion_of_MBP-linker-AKAP79_10xHis)_(human)	Fusion_of_MBP-linker-AKAP79_10xHis)_(human)	484	513
8658	4188.04	4188.04	2.087	1968.84	1467.79	K[325.13]C[160.03]PQEAGASDQPEPTR	LKIPC[160.03]IK[325.13]FPR	0.0001	0.0014	KCPQEAGASDQPEPTR	LKIPCIKFPR	8660	8659	Fusion_of_MBP-linker-AKAP79_10xHis)_(human)	Fusion_of_MBP-linker-AKAP79_10xHis)_(human)	484	554
6947	3504.71	3504.72	2.128	1373.59	1379.71	EVFDNDGK[325.13]PR	VDILK[325.13]AHLM[147.04]K	0.0678	0.0014	EVFDNDGKPR	VDILKAHLMK	6950	6949	CnA_(human)	CnA_(human)	40	47
8923	3806.84	3806.85	2.168	2168.02	887.412	HLTEYFTFKQEC[160.03]K[325.13]IK	K[325.13]MVVDV	1.93e-05	0.0385	HLTEYFTFKQECKIK	KMVVDV	8925	8924	CnA_(human)	CnB_(human)	167	165
8110	4180.07	4181.06	2.579	1561.73	1866.93	ITSFEEAK[325.13]GLDR	QTLQSAIK[325.13]GFSPQHK	0.0037	0.0018	ITSFEEAKGLDR	QTLQSAIKGFSPQHK	8113	8114	CnA_(human)	CnA_(human)	464	449
15217	7977.11	7978.09	2.769	3801.86	3423.84	FGGYAQSGLLAEITPDK[325.13]AFQDKLYPFTWDAVR	YNGK[325.13]LIAYPIAVEALSLIYNKDLLPNPPK	0.0137	0.0604	FGGYAQSGLLAEITPDKAFQDKLYPFTWDAVR	YNGKLIAYPIAVEALSLIYNKDLLPNPPK	15221	15220	Fusion_of_MBP-linker-AKAP79_10xHis)_(human)	Fusion_of_MBP-linker-AKAP79_10xHis)_(human)	109	128
12196	3316.76	3316.77	2.819	991.462	1573.9	IK[325.13]YSER	ILYPK[325.13]TLFLLR	0.015	4.01e-05	IKYSER	ILYPKTLFLLR	12199	12198	CnA_(human)	CnA_(human)	169	142
1974	3173.66	3173.67	3.312	1679.85	742.407	ALKPK[325.13]AGSEAADVAR	KK[325.13]AAK	9.16e-06	0.0016	ALKPKAGSEAADVAR	KKAAK	1978	1975	Fusion_of_MBP-linker-AKAP79_10xHis)_(human)	Fusion_of_MBP-linker-AKAP79_10xHis)_(human)	473	465
7743	4323.11	4323.13	3.462	1785.85	1785.85	LTAK[325.13]EVFDNDGKPR	LTAK[325.13]EVFDNDGKPR	5.36e-05	0.0002	LTAKEVFDNDGKPR	LTAKEVFDNDGKPR	7747	7746	CnA_(human)	CnA_(human)	32	32
10619	3106.61	3106.62	3.835	886.411	1468.79	K[325.13]MVVDV	LKIPC[160.03]IK[325.13]FPR	0.0397	0.0013	KMVVDV	LKIPCIKFPR	10620	10623	CnB_(human)	Fusion_of_MBP-linker-AKAP79_10xHis)_(human)	165	554
11039	6137.9	6137.92	3.94	2829.33	2557.16	EAFSLFDKDGDGTITTK[325.13]ELGTVMR	HVMTNLGEK[325.13]LTDEEVDEMIR	1.48e-07	6.97e-08	EAFSLFDKDGDGTITTKELGTVMR	HVMTNLGEKLTDEEVDEMIR	11043	11040	CaM_(mouse)	CaM_(mouse)	31	116
4817	4294.94	4295.93	4.087	2397.02	1146.52	DTELSQESDFK[325.13]ENGITEEK	SK[325.13]SEESKR	0.0002	0.0465	DTELSQESDFKENGITEEK	SKSEESKR	4819	4820	Fusion_of_MBP-linker-AKAP79_10xHis)_(human)	Fusion_of_MBP-linker-AKAP79_10xHis)_(human)	741	751
8556	2903.51	2903.52	4.166	1084.53	1067.57	GAWASLK[325.13]R	LK[325.13]IPC[160.03]IK	0.0021	0.0348	GAWASLKR	LKIPCIK	8558	8559	Fusion_of_MBP-linker-AKAP79_10xHis)_(human)	Fusion_of_MBP-linker-AKAP79_10xHis)_(human)	506	549
7696	3750.82	3750.84	4.852	1067.57	1931.85	LK[325.13]IPC[160.03]IK	SNHSK[325.13]IIEDSDC[160.03]SIK	0.0132	0.0141	LKIPCIK	SNHSKIIEDSDCSIK	7699	7700	Fusion_of_MBP-linker-AKAP79_10xHis)_(human)	Fusion_of_MBP-linker-AKAP79_10xHis)_(human)	549	566
11912	3255.69	3255.71	6.321	1572.89	931.389	ILYPK[325.13]TLFLLR	SEESK[325.13]R	0.0261	0.0227	ILYPKTLFLLR	SEESKR	11914	11915	CnA_(human)	Fusion_of_MBP-linker-AKAP79_10xHis)_(human)	142	756
6487	3765.78	3766.74	13.396	1084.53	1929.85	GAWASLK[325.13]R	SNHSK[325.13]IIEDSDC[160.03]SIK	0.0723	6e-06	GAWASLKR	SNHSKIIEDSDCSIK	6488	6491	Fusion_of_MBP-linker-AKAP79_10xHis)_(human)	Fusion_of_MBP-linker-AKAP79_10xHis)_(human)	506	566
7261	3424.74	3424.74	NA	840.434	1832.9	K[325.13]EVIR	AAVLK[325.13]YENNVMNIR	0.0089	0.0007	KEVIR	AAVLKYENNVMNIR	7262	7263	CnA_(human)	CnA_(human)	393	323
7853	3901.99	3902.94	NA	1364.72	1785.86	VDILK[325.13]AHLMK	LTAK[325.13]EVFDNDGKPR	0.0177	0.0395	VDILKAHLMK	LTAKEVFDNDGKPR	7856	7855	CnA_(human)	CnA_(human)	47	32
9285	4744.23	4744.25	NA	1950.9	2041.92	VFDK[325.13]DGNGYISAAELR	EAFSLFDK[325.13]DGDGTITTK	5.18e-05	0.0041	VFDKDGNGYISAAELR	EAFSLFDKDGDGTITTK	9286	9287	CaM_(mouse)	CaM_(mouse)	95	22
9545	5258.47	5259.45	NA	1950.9	2556.16	VFDK[325.13]DGNGYISAAELR	HVMTNLGEK[325.13]LTDEEVDEMIR	0.0003	5.86e-06	VFDKDGNGYISAAELR	HVMTNLGEKLTDEEVDEMIR	9548	9547	CaM_(mouse)	CaM_(mouse)	95	116
7153	3488.72	3488.72	NA	1363.72	1373.59	VDILK[325.13]AHLMK	EVFDNDGK[325.13]PR	0.0212	0.0061	VDILKAHLMK	EVFDNDGKPR	7156	7157	CnA_(human)	CnA_(human)	47	40
9923	5531.64	5531.62	NA	1951.9	2828.33	VFDK[325.13]DGNGYISAAELR	EAFSLFDKDGDGTITTK[325.13]ELGTVMR	0.0016	0.0005	VFDKDGNGYISAAELR	EAFSLFDKDGDGTITTKELGTVMR	9924	9925	CaM_(mouse)	CaM_(mouse)	95	31
11763	5823.93	5824.95	NA	2336.19	2736.33	GQPSK[325.13]PFVGVLSAGINAASPNK	ELAK[325.13]EFLENYLLTDEGLEAVNK	0.0052	0.0176	GQPSKPFVGVLSAGINAASPNK	ELAKEFLENYLLTDEGLEAVNK	11766	11765	Fusion_of_MBP-linker-AKAP79_10xHis)_(human)	Fusion_of_MBP-linker-AKAP79_10xHis)_(human)	282	303
2411	3332.55	3333.55	NA	614.31	1966.83	K[325.13]AAK	K[325.13]C[160.03]PQEAGASDQPEPTR	0.0143	2.08e-05	KAAK	KCPQEAGASDQPEPTR	2412	2413	Fusion_of_MBP-linker-AKAP79_10xHis)_(human)	Fusion_of_MBP-linker-AKAP79_10xHis)_(human)	465	484
8699	5312.51	5313.51	NA	1950.9	2610.21	VFDK[325.13]DGNGYISAAELR	QQK[325.13]PLEGEMQPAINAEDADLSK	0.0008	0.0018	VFDKDGNGYISAAELR	QQKPLEGEMQPAINAEDADLSK	8702	8703	CaM_(mouse)	Fusion_of_MBP-linker-AKAP79_10xHis)_(human)	95	522
1879	3735.71	3736.71	NA	1017.47	1966.83	K[325.13]RSESSK	K[325.13]C[160.03]PQEAGASDQPEPTR	0.0005	0.0474	KRSESSK	KCPQEAGASDQPEPTR	1882	1883	Fusion_of_MBP-linker-AKAP79_10xHis)_(human)	Fusion_of_MBP-linker-AKAP79_10xHis)_(human)	513	484
11239	4156.2	4157.2	NA	1572.9	1831.9	ILYPK[325.13]TLFLLR	AAVLK[325.13]YENNVMNIR	0.0745	0.0031	ILYPKTLFLLR	AAVLKYENNVMNIR	11242	11241	CnA_(human)	CnA_(human)	142	323
11346	4573.22	4574.21	NA	1767.85	2053.96	TWEEIPALDK[325.13]ELK	AFQDK[325.13]LYPFTWDAVR	0.0264	0.0855	TWEEIPALDKELK	AFQDKLYPFTWDAVR	11349	11350	Fusion_of_MBP-linker-AKAP79_10xHis)_(human)	Fusion_of_MBP-linker-AKAP79_10xHis)_(human)	163	114

## Sheet: InactiveState(+EDTA)
MS2_Scan_Number	MS2_Query_Mass	MS2_Precursor_Mass	MS2_PPM_Error	MS2_Peptide1_Mass	MS2_Peptide2_Mass	MS3_Peptide1_ID	MS3_Peptide2_ID	MS3_Peptide1_ProphetExpectScore	MS3_Peptide2_ProphetExpectScore	MS3_Peptide1_PlainSequence	MS3_Peptide2_PlainSequence	MS3_Scan_Peptide1	MS3_Scan_Peptide2	MS3_Protein1_ID	MS3_Protein2_ID	Peptide1_LinkedLys_Position	Peptide2_LinkedLys_Position
7025	3863.9	3863.9	0.066	942.461	2170.03	AIGK[325.13]MAR	HLTEYFTFKQEC[160.03]K[325.13]IK	2.46e-06	0.0002	AIGKMAR	HLTEYFTFKQECKIK	7028	7029	CnA_(human)	CnA_(human)	405	167
13754	8472.04	8472.04	0.085	4605.1	3115.54	FKEPPAYGPMC[160.03]DILWSDPLEDFGNEK[325.13]TQEHFTHNTVR	K[325.13]SQTTGFPSLITIFSAPNYLDVYNNK	0.0167	0.0197	FKEPPAYGPMCDILWSDPLEDFGNEKTQEHFTHNTVR	KSQTTGFPSLITIFSAPNYLDVYNNK	13758	13755	CnA_(human)	CnA_(human)	243	293
9480	3304.74	3304.74	0.092	1084.53	1468.8	GAWASLK[325.13]R	LK[325.13]IPC[160.03]IKFPR	0.0006	7.85e-05	GAWASLKR	LKIPCIKFPR	9483	9482	Fusion_of_MBP-linker-AKAP79_10xHis)_(human)	Fusion_of_MBP-linker-AKAP79_10xHis)_(human)	506	549
6973	4526.34	4526.34	0.164	2036.02	1738.91	AHLMK[325.13]EGRLEESVALR	AIDPK[325.13]LSTTDRVVK	9.83e-05	0.0234	AHLMKEGRLEESVALR	AIDPKLSTTDRVVK	6977	6974	CnA_(human)	CnA_(human)	52	10
7666	4244.15	4244.15	0.204	1137.53	2355.22	AHLMK[325.13]EGR	LTAK[325.13]EVFDNDGKPRVDILK	0.0006	0.0096	AHLMKEGR	LTAKEVFDNDGKPRVDILK	7669	7670	CnA_(human)	CnA_(human)	52	32
7609	4991.58	4991.58	0.222	2035.02	2205.15	AHLMK[325.13]EGRLEESVALR	LSTTDRVVK[325.13]AVPFPPSHR	8.74e-05	0.0027	AHLMKEGRLEESVALR	LSTTDRVVKAVPFPPSHR	7610	7613	CnA_(human)	CnA_(human)	52	19
5489	3805.78	3805.78	0.292	1084.53	1969.84	GAWASLK[325.13]R	K[325.13]C[160.03]PQEAGASDQPEPTR	0.0053	9.77e-05	GAWASLKR	KCPQEAGASDQPEPTR	5492	5491	Fusion_of_MBP-linker-AKAP79_10xHis)_(human)	Fusion_of_MBP-linker-AKAP79_10xHis)_(human)	506	484
13554	5625.88	5625.88	0.379	1572.9	3301.57	ILYPK[325.13]TLFLLR	QEK[325.13]NLLDIDAPVTVC[160.03]GDIHGQFFDLMK	3.54e-06	0.0003	ILYPKTLFLLR	QEKNLLDIDAPVTVCGDIHGQFFDLMK	13557	13558	CnA_(human)	CnA_(human)	142	76
13860	6679.5	6679.49	0.382	4355.19	1572.9	IITEGASILRQEK[325.13]NLLDIDAPVTVC[160.03]GDIHGQFFDLMK	ILYPK[325.13]TLFLLR	0.0012	0.0001	IITEGASILRQEKNLLDIDAPVTVCGDIHGQFFDLMK	ILYPKTLFLLR	13864	13863	CnA_(human)	CnA_(human)	76	142
11770	4157.2	4157.21	0.425	1832.9	1572.9	AAVLK[325.13]YENNVMNIR	ILYPK[325.13]TLFLLR	3.37e-09	6.97e-05	AAVLKYENNVMNIR	ILYPKTLFLLR	11774	11773	CnA_(human)	CnA_(human)	323	142
7143	3693.88	3693.89	0.499	1412.68	1529.8	AIDPK[325.13]LSTTDR	VVK[325.13]AVPFPPSHR	5.51e-05	0.0008	AIDPKLSTTDR	VVKAVPFPPSHR	7144	7145	CnA_(human)	CnA_(human)	10	19
10755	3052.65	3052.65	0.504	1573.9	727.351	ILYPK[325.13]TLFLLR	K[325.13]LDR	7.15e-06	0.0107	ILYPKTLFLLR	KLDR	10759	10758	CnA_(human)	CnA_(human)	142	214
3895	2550.29	2551.3	0.62	958.455	840.434	AIGK[325.13]M[147.04]AR	K[325.13]EVIR	0.0052	3.35e-05	AIGKMAR	KEVIR	3899	3898	CnA_(human)	CnA_(human)	405	393
11242	4680.52	4680.52	0.628	1573.9	2355.22	ILYPK[325.13]TLFLLR	LTAK[325.13]EVFDNDGKPRVDILK	0.0001	0.0031	ILYPKTLFLLR	LTAKEVFDNDGKPRVDILK	11245	11246	CnA_(human)	CnA_(human)	142	32
8293	3901.99	3901.99	0.641	1786.87	1363.72	LTAK[325.13]EVFDNDGKPR	VDILK[325.13]AHLMK	3.29e-05	0.0005	LTAKEVFDNDGKPR	VDILKAHLMK	8297	8296	CnA_(human)	CnA_(human)	32	47
9398	3303.73	3304.73	0.659	1084.53	1467.79	GAWASLK[325.13]R	LKIPC[160.03]IK[325.13]FPR	0.0007	0.0005	GAWASLKR	LKIPCIKFPR	9399	9400	Fusion_of_MBP-linker-AKAP79_10xHis)_(human)	Fusion_of_MBP-linker-AKAP79_10xHis)_(human)	506	554
10222	4138.03	4138.03	0.976	2546.19	840.436	IYDMDK[325.13]DGYISNGELFQVLK	K[325.13]EVIR	1.93e-06	0.0025	IYDMDKDGYISNGELFQVLK	KEVIR	10224	10223	CnB_(human)	CnA_(human)	103	393
6361	3627.86	3627.86	1.057	2036.02	840.436	AHLMK[325.13]EGRLEESVALR	K[325.13]EVIR	6.43e-05	0.0078	AHLMKEGRLEESVALR	KEVIR	6363	6362	CnA_(human)	CnA_(human)	52	393
8380	2873.51	2873.52	1.422	653.313	1468.79	GPK[325.13]R	LK[325.13]IPC[160.03]IKFPR	0.0261	0.0005	GPKR	LKIPCIKFPR	8383	8384	Fusion_of_MBP-linker-AKAP79_10xHis)_(human)	Fusion_of_MBP-linker-AKAP79_10xHis)_(human)	560	549
12708	4734.37	4734.36	1.429	3114.54	868.431	K[325.13]SQTTGFPSLITIFSAPNYLDVYNNK	SK[325.13]NVPK	3.39e-06	0.0187	KSQTTGFPSLITIFSAPNYLDVYNNK	SKNVPK	12712	12709	CnA_(human)	Fusion_of_MBP-linker-AKAP79_10xHis)_(human)	293	779
13194	5698.86	5698.85	1.562	1831.91	3115.54	AAVLK[325.13]YENNVMNIR	K[325.13]SQTTGFPSLITIFSAPNYLDVYNNK	6.28e-05	0.0013	AAVLKYENNVMNIR	KSQTTGFPSLITIFSAPNYLDVYNNK	13197	13196	CnA_(human)	CnA_(human)	323	293
6569	3647.81	3647.8	1.757	2170.03	726.368	HLTEYFTFKQEC[160.03]K[325.13]IK	NK[325.13]IR	2.02e-06	0.0246	HLTEYFTFKQECKIK	NKIR	6573	6572	CnA_(human)	CnA_(human)	167	399
8209	4845.53	4845.54	2.282	1738.91	2355.22	AIDPK[325.13]LSTTDRVVK	LTAK[325.13]EVFDNDGKPRVDILK	0.0048	0.0083	AIDPKLSTTDRVVK	LTAKEVFDNDGKPRVDILK	8212	8211	CnA_(human)	CnA_(human)	10	32
7830	3526.77	3526.78	2.322	1832.9	942.461	AAVLK[325.13]YENNVMNIR	AIGK[325.13]MAR	1.95e-09	0.0374	AAVLKYENNVMNIR	AIGKMAR	7834	7833	CnA_(human)	CnA_(human)	323	405
11792	6808.31	6808.3	2.401	3802.86	2254.04	FGGYAQSGLLAEITPDKAFQDK[325.13]LYPFTWDAVR	YENGK[325.13]YDIKDVGVDNAGAK	0.016	2.65e-06	FGGYAQSGLLAEITPDKAFQDKLYPFTWDAVR	YENGKYDIKDVGVDNAGAK	11794	11795	Fusion_of_MBP-linker-AKAP79_10xHis)_(human)	Fusion_of_MBP-linker-AKAP79_10xHis)_(human)	114	201
11192	4679.53	4679.54	2.647	1572.9	2355.22	ILYPK[325.13]TLFLLR	LTAKEVFDNDGK[325.13]PRVDILK	0.0039	5.3e-05	ILYPKTLFLLR	LTAKEVFDNDGKPRVDILK	11195	11194	CnA_(human)	CnA_(human)	142	40
8646	5310.77	5311.75	5.11	2204.15	2355.22	LSTTDRVVK[325.13]AVPFPPSHR	LTAK[325.13]EVFDNDGKPRVDILK	0.0096	0.0002	LSTTDRVVKAVPFPPSHR	LTAKEVFDNDGKPRVDILK	8649	8648	CnA_(human)	CnA_(human)	19	32
9669	5557.65	5557.68	5.252	2553.22	2253.03	FGGYAQSGLLAEITPDK[325.13]AFQDK	YENGK[325.13]YDIKDVGVDNAGAK	1.78e-05	4.83e-05	FGGYAQSGLLAEITPDKAFQDK	YENGKYDIKDVGVDNAGAK	9671	9670	Fusion_of_MBP-linker-AKAP79_10xHis)_(human)	Fusion_of_MBP-linker-AKAP79_10xHis)_(human)	109	201
11386	4265.26	4265.29	6.757	1940.95	1572.9	EVFDNDGK[325.13]PRVDILK	ILYPK[325.13]TLFLLR	0.0009	1.93e-05	EVFDNDGKPRVDILK	ILYPKTLFLLR	11390	11389	CnA_(human)	CnA_(human)	40	142
