# Supplementary figures and images for: Intrinsic disorder within AKAP79 fine-tunes anchored phosphatase activity toward substrates and drug sensitivity
Source: eLife journal article supplement (doi:10.7554/elife.30872), 2017-09-29

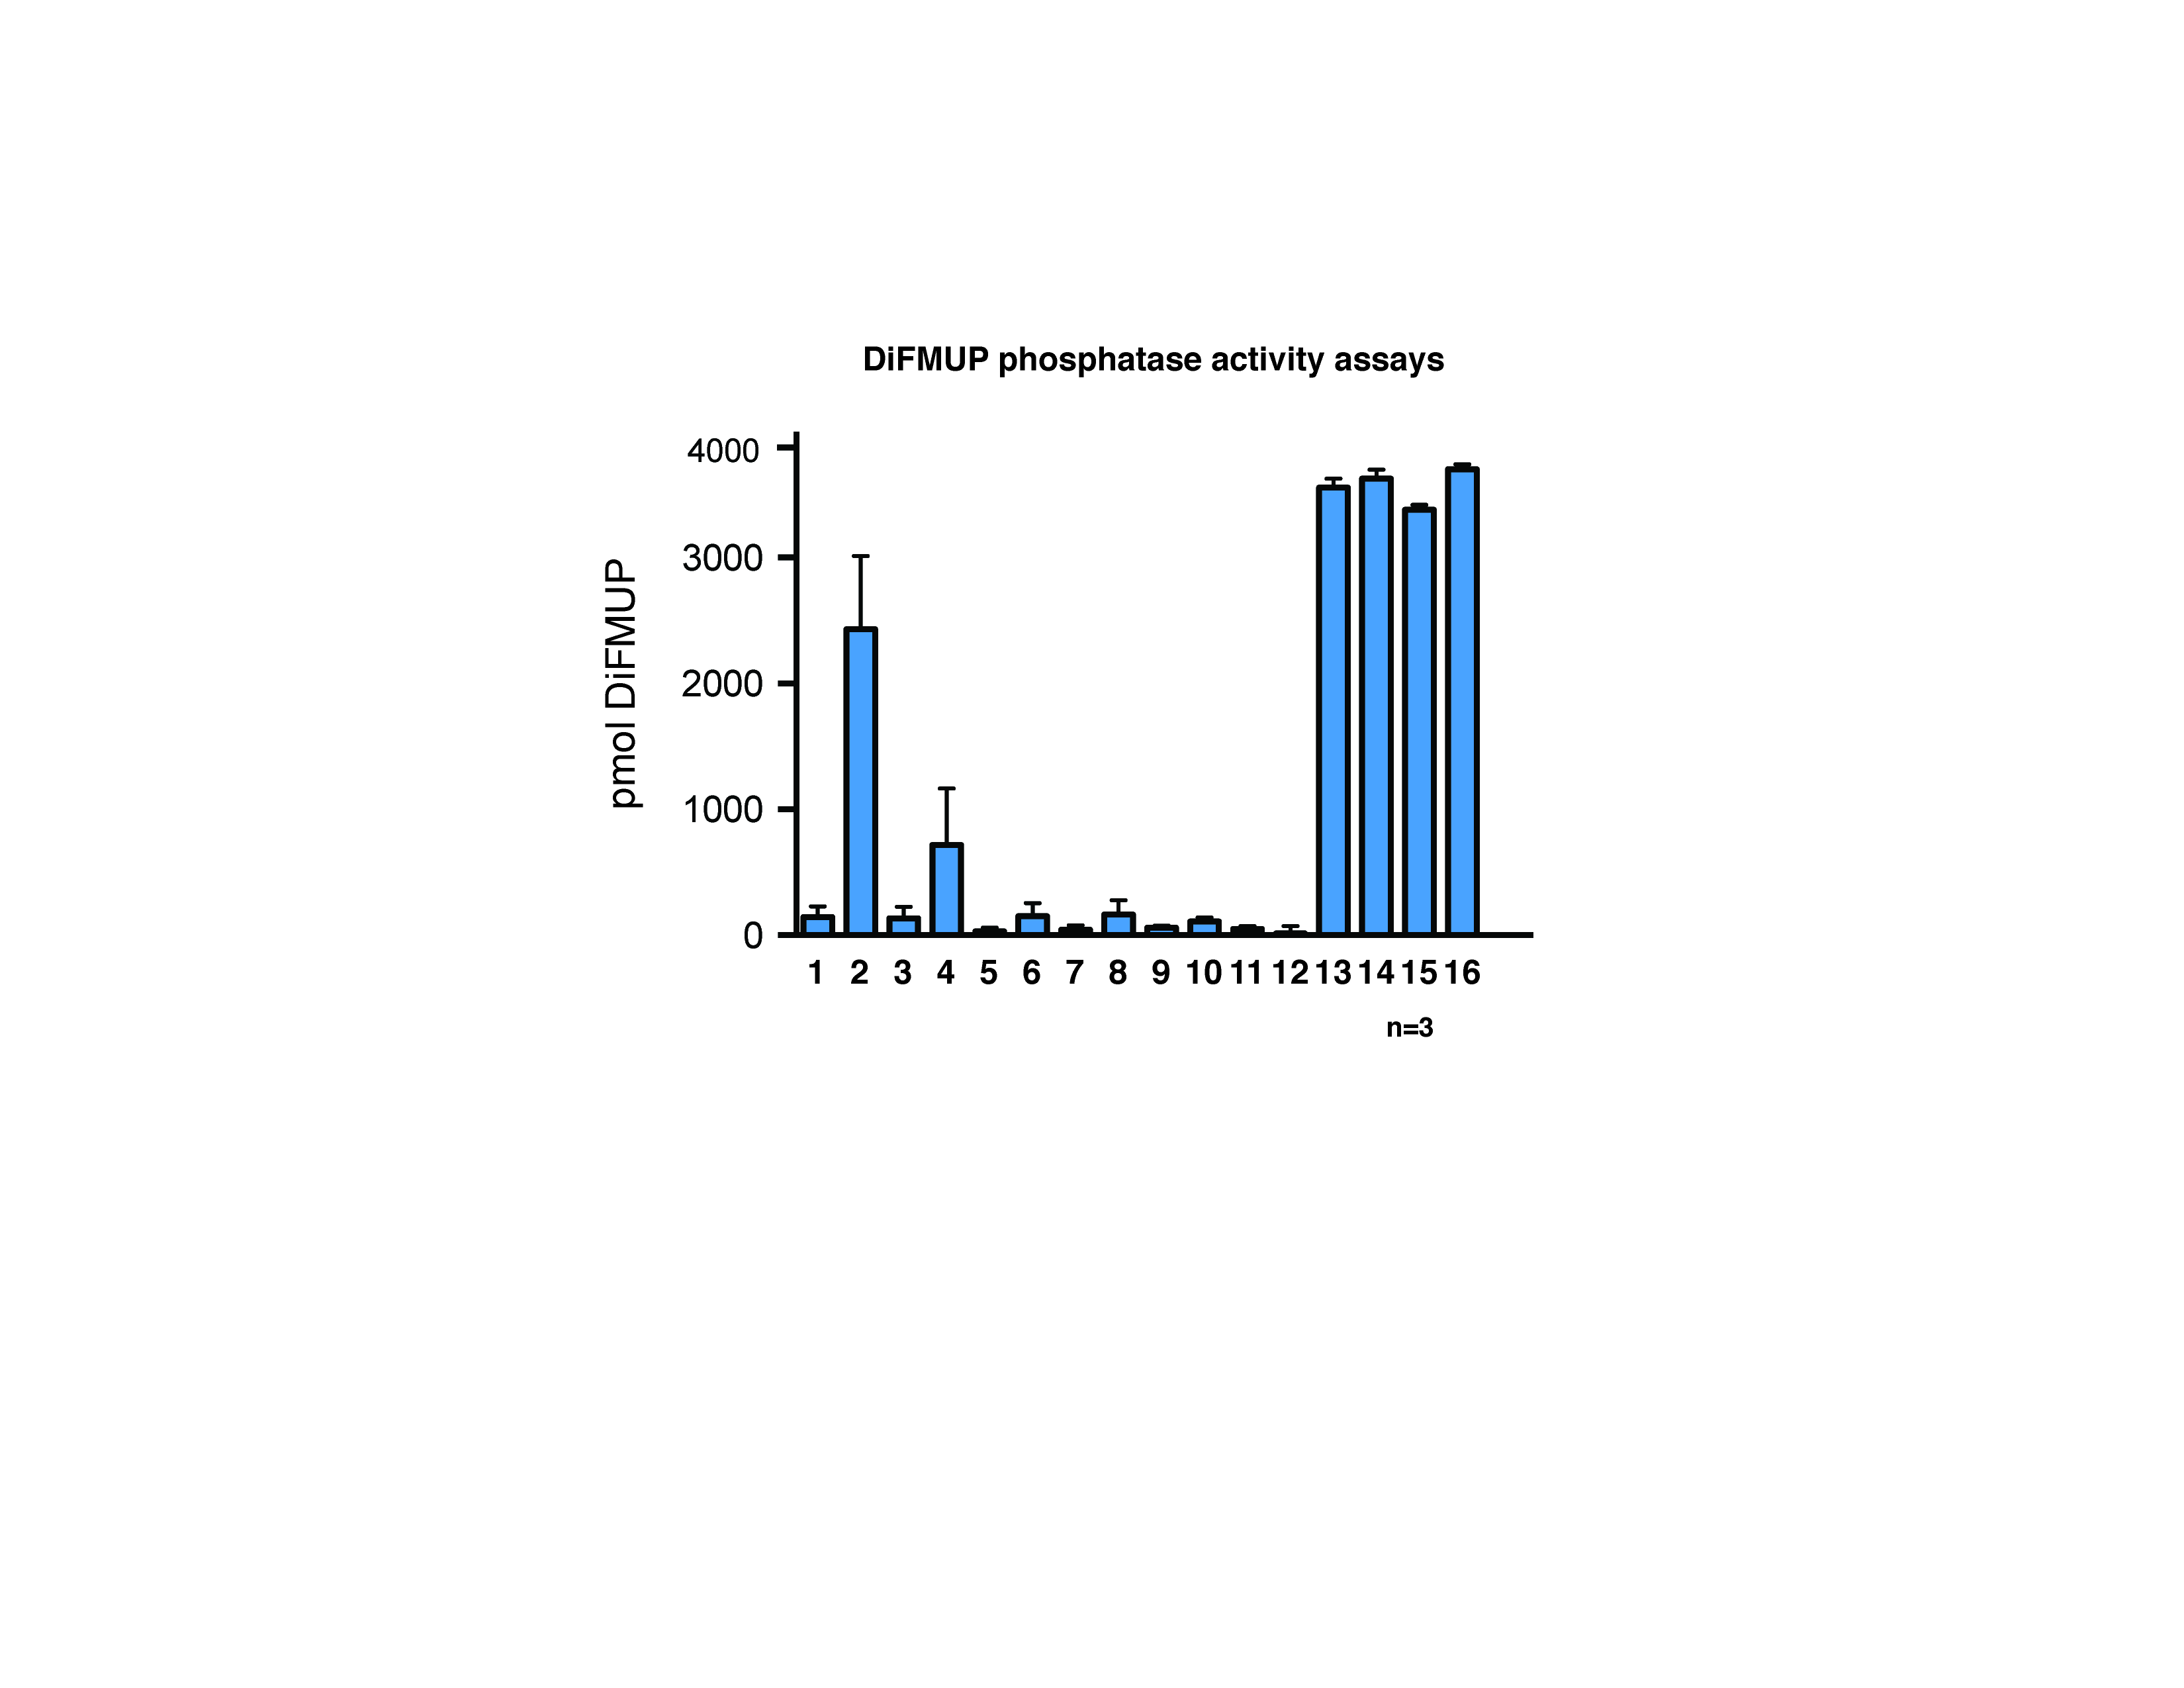

Supplement: supp [file elife-30872-supp-v1.zip › elife_poa_e30872_Figure_6_figure_supplement_1.tif]

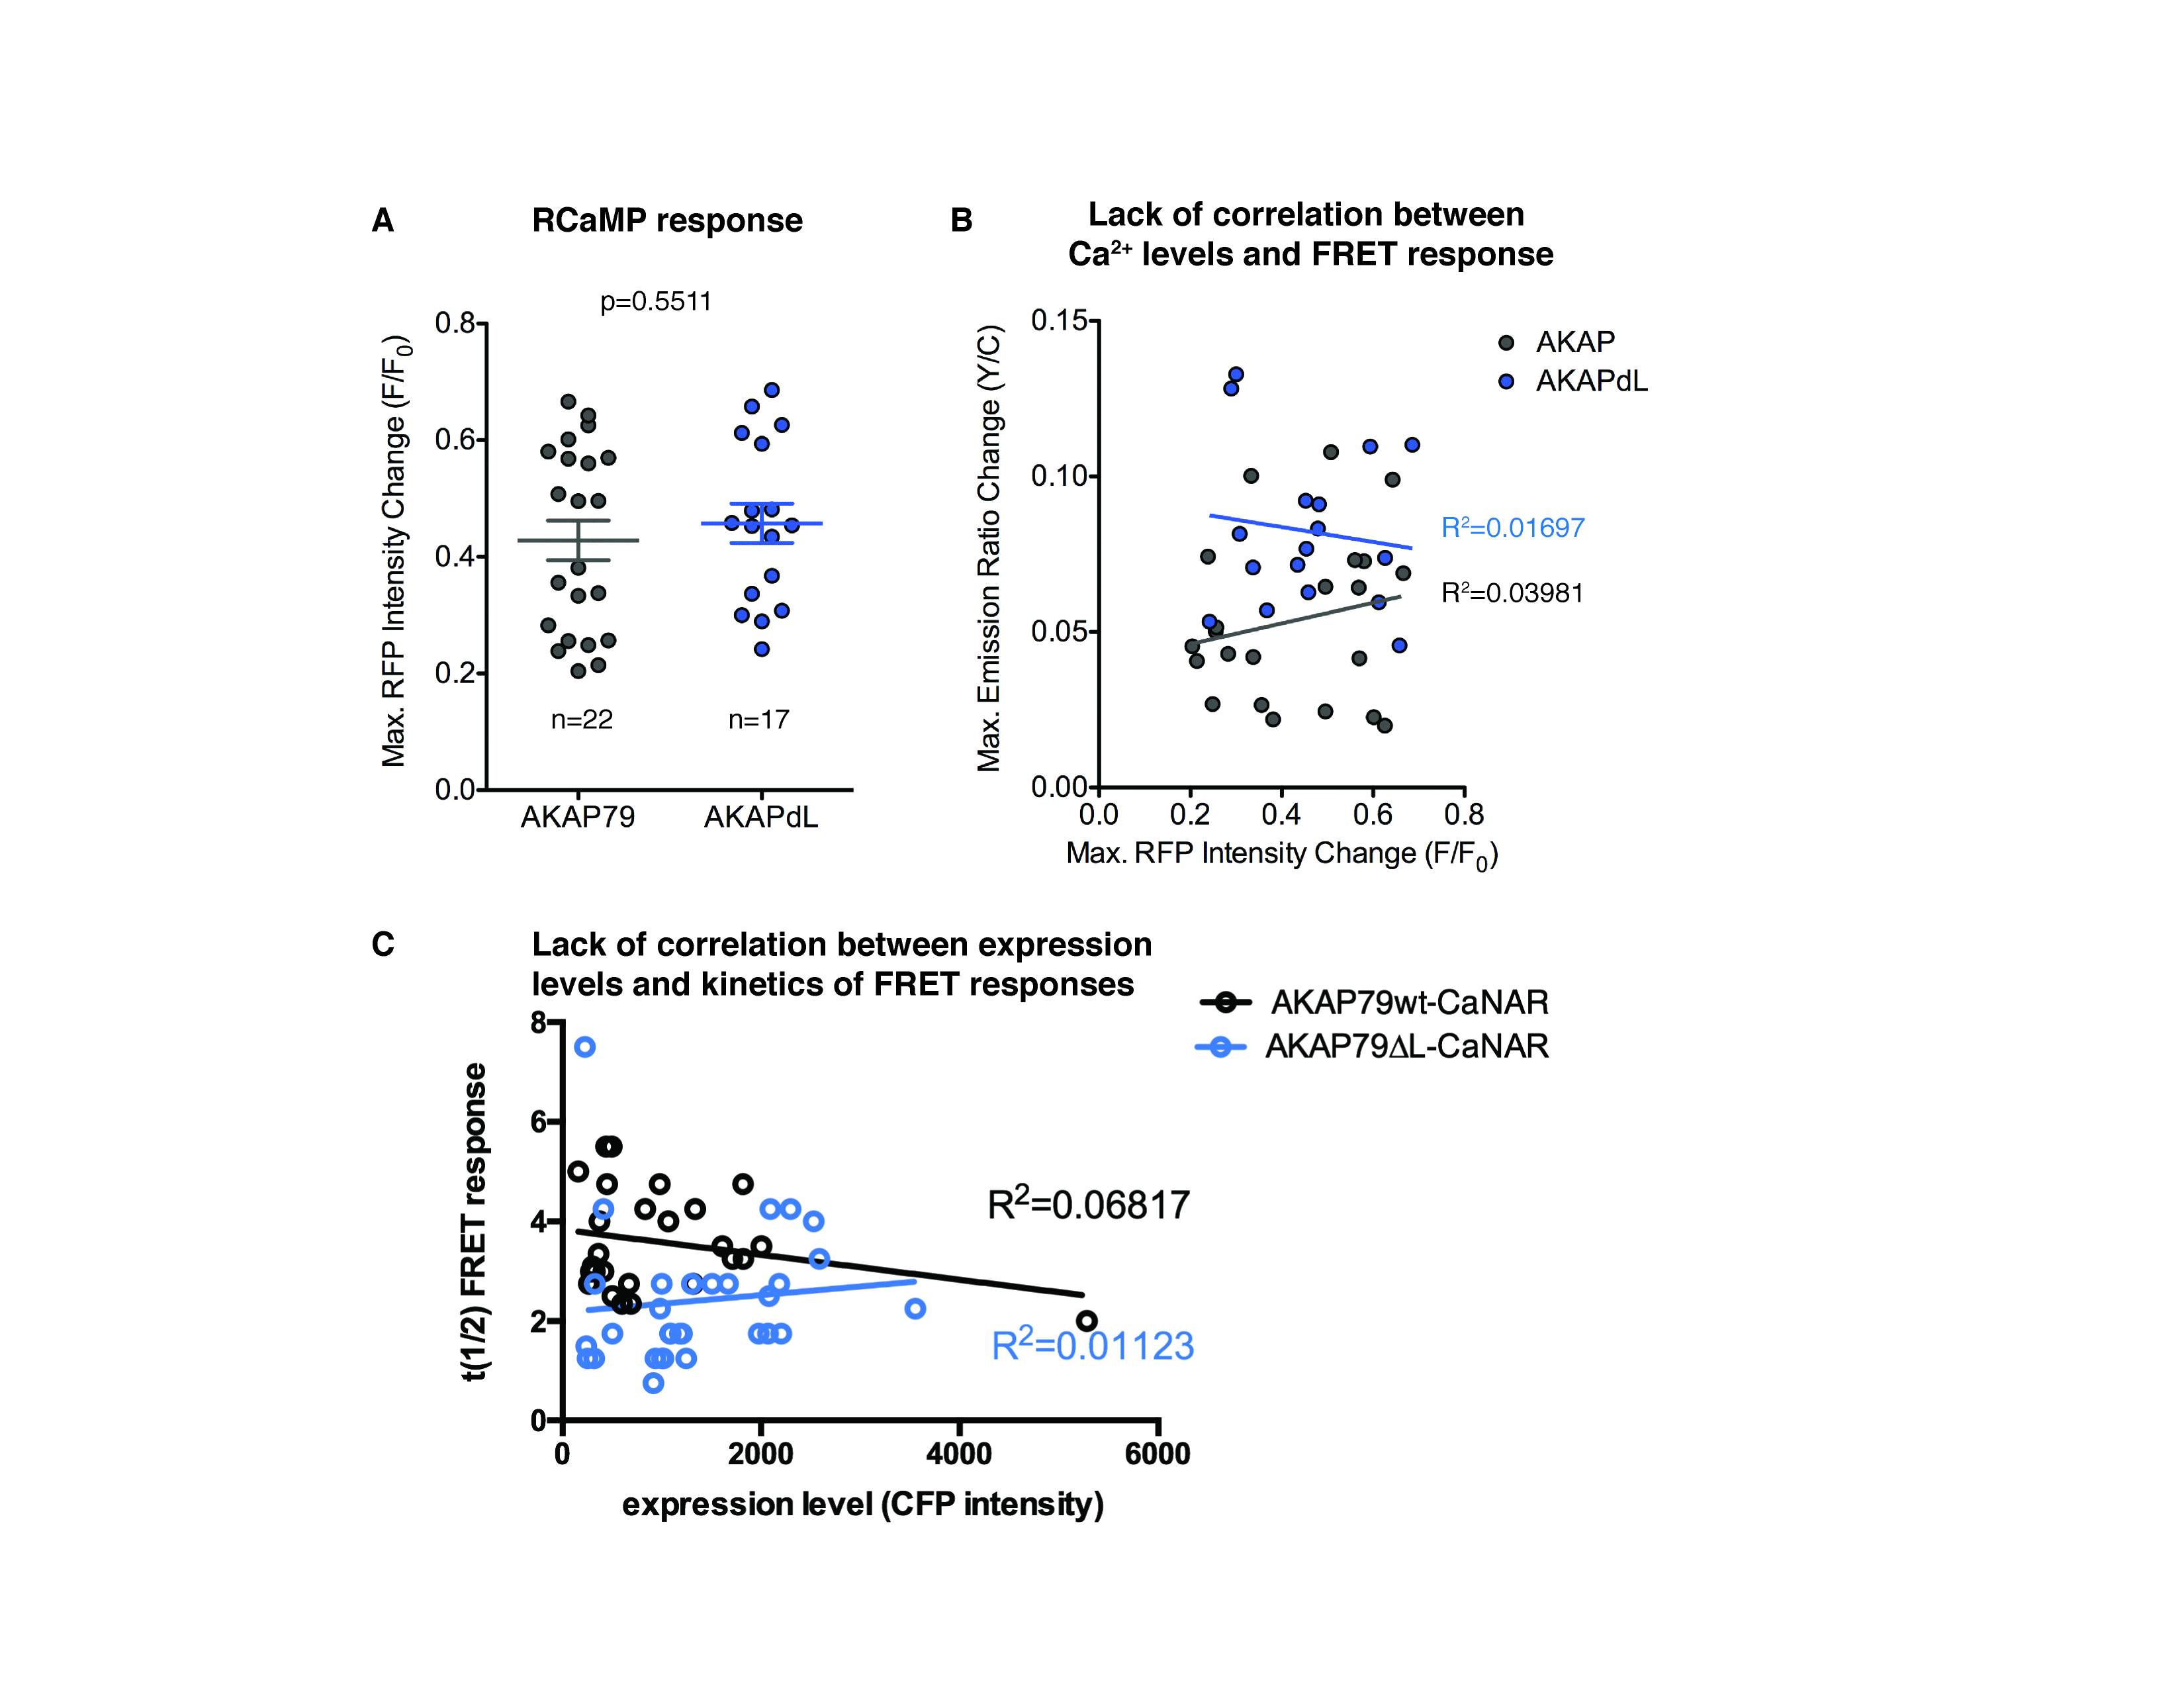

Supplement: supp [file elife-30872-supp-v1.zip › elife_poa_e30872_Figure_7_figure_supplement_1.tif]
